# Supplementary material for: Impact of the COVID-19 Pandemic on Manual Therapy Service Utilization within the Australian Private Healthcare Setting
Source: Healthcare (Basel). 2020 Dec 13;8(4):558. doi: 10.3390/healthcare8040558 (PMC7764415; doi:10.3390/healthcare8040558)

# Supplementary Materials

## Table of Contents

|                                                                                                                                                                                                                                                                                                                |           |
|----------------------------------------------------------------------------------------------------------------------------------------------------------------------------------------------------------------------------------------------------------------------------------------------------------------|-----------|
| <b>Section A: Demographics of population with private health insurance .....</b>                                                                                                                                                                                                                               | <b>2</b>  |
| <b>Supplementary Figure S1:</b> Pyramid plot depicting the number of persons insured under general treatment cover by sex and age group in the second quarter of 2020 .....                                                                                                                                    | <b>2</b>  |
| <b>Section B: Supplementary analyses per 100,000 insured persons .....</b>                                                                                                                                                                                                                                     | <b>3</b>  |
| <b>Supplementary Figure S2:</b> Time series plot of observed values and point forecast estimates with 95% prediction intervals of the quarterly number of services provided per 100,000 insured persons by each manual therapy profession from 2015 to 2020 Q2.....                                            | <b>3</b>  |
| <b>Supplementary Figure S3:</b> Time series plot of observed values and point forecast estimates with 95% prediction intervals of the quarterly total cost of services provided per 100,000 insured persons by each manual therapy profession from 2015 to 2020 Q2.....                                        | <b>4</b>  |
| <b>Supplementary Table S1:</b> Observed values, forecast point estimates with 95% prediction intervals, mean errors, and mean percentage errors of the quarterly number and total cost of services provided per 100,000 insured persons by each manual therapy profession in Australia during 2020 Q1 and Q2.. | <b>5</b>  |
| <b>Supplementary Figure S4:</b> Heatmap of the estimated mean percentage error in number of services provided per 100,000 insured persons by each manual therapy profession during the first half of 2020 across Australian States and Territories .....                                                       | <b>6</b>  |
| <b>Supplementary Figure S5:</b> Heatmap of the estimated mean percentage error in total cost of services provided per 100,000 insured persons by each manual therapy profession during the first half of 2020 across Australian States and Territories .....                                                   | <b>7</b>  |
| <b>Section C: Supplementary analyses per provider .....</b>                                                                                                                                                                                                                                                    | <b>8</b>  |
| <b>Supplementary Figure S6:</b> Time series plot of observed values and point forecast estimates with 95% prediction intervals of the quarterly number of services provided per provider by each manual therapy profession from 2015 to 2020 Q2 .....                                                          | <b>8</b>  |
| <b>Supplementary Figure S7:</b> Time series plot of observed values and point forecast estimates with 95% prediction intervals of the quarterly total cost of services provided per provider by each manual therapy profession from 2015 to 2020 Q2 .....                                                      | <b>9</b>  |
| <b>Supplementary Table S2:</b> Observed values, forecast point estimates with 95% prediction intervals, mean errors, and mean percentage errors of the quarterly number and total cost of services provided per provider by each manual therapy profession in Australia during 2020 Q1 and Q2.....             | <b>10</b> |
| <b>Supplementary Figure S8:</b> Heatmap of the estimated mean percentage error in number of services provided per provider by each manual therapy profession during the first half of 2020 across Australian States and Territories.....                                                                       | <b>11</b> |
| <b>Supplementary Figure S9:</b> Heatmap of the estimated mean percentage error in total cost of services provided per provider by each manual therapy profession during the first half of 2020 across Australian States and Territories.....                                                                   | <b>12</b> |

## Section A: Demographics of population with private health insurance

**Supplementary Figure S1:** Pyramid plot depicting the number of persons insured under general treatment cover by sex and age group in the second quarter of 2020

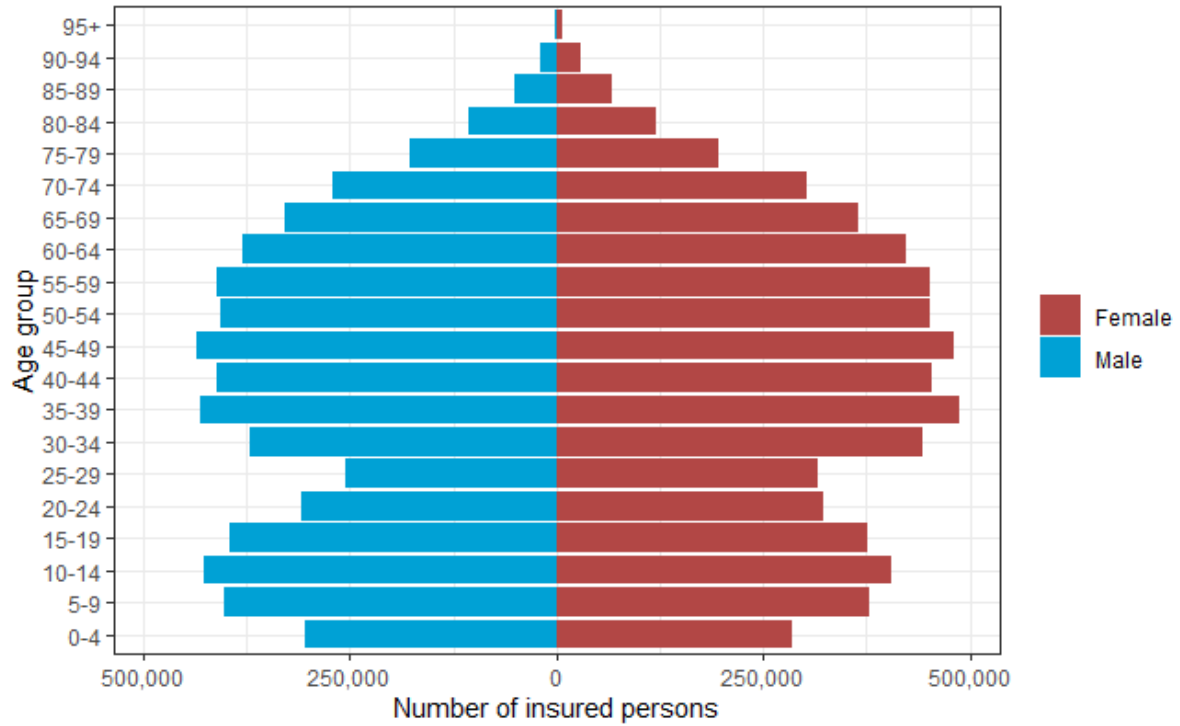

## Section B: Supplementary analyses per 100,000 insured persons

**Supplementary Figure S2:** Time series plot of observed values and point forecast estimates with 95% prediction intervals of the quarterly number of services provided per 100,000 insured persons by each manual therapy profession from 2015 to 2020 Q2

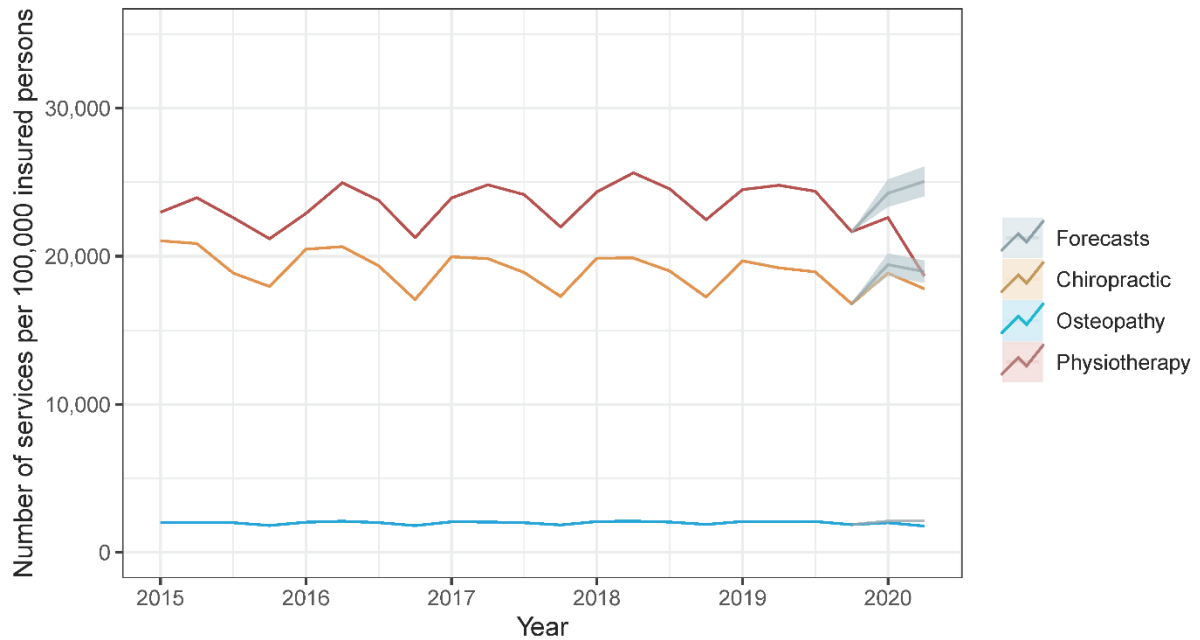

**Supplementary Figure S3:** Time series plot of observed values and point forecast estimates with 95% prediction intervals of the quarterly total cost of services provided per 100,000 insured persons by each manual therapy profession from 2015 to 2020 Q2

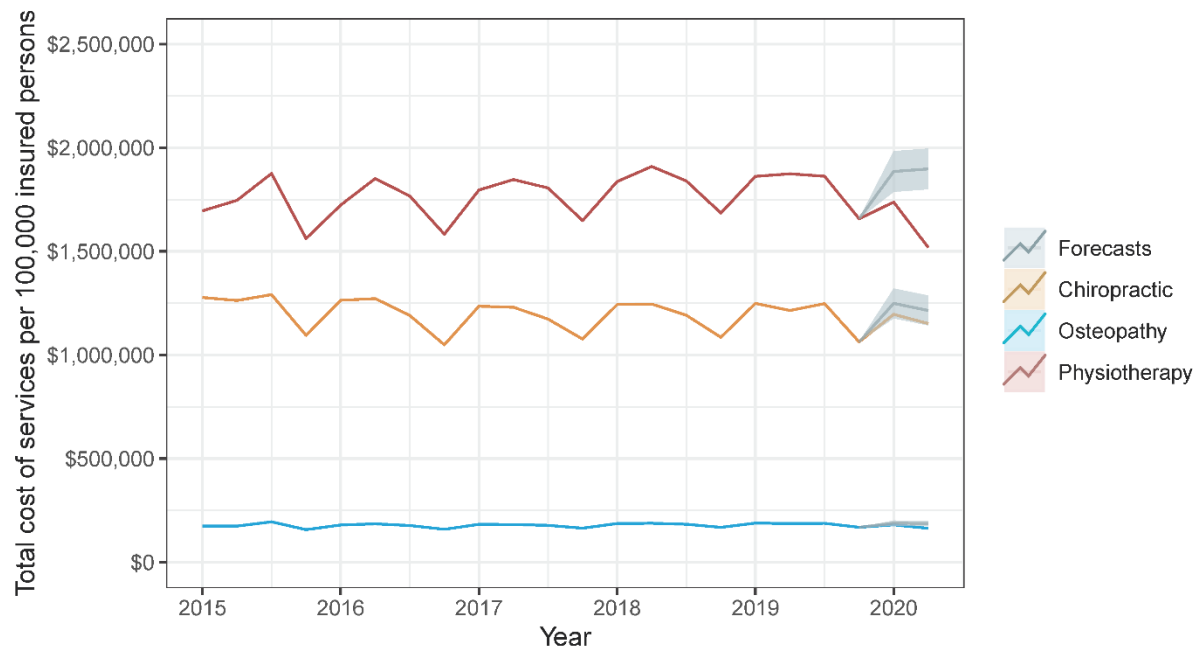

**Supplementary Table S1:** Observed values, forecast point estimates with 95% prediction intervals, mean errors, and mean percentage errors of the quarterly number and total cost of services provided per 100,000 insured persons by each manual therapy profession in Australia during 2020 Q1 and Q2

|                           | <b>Chiropractic</b>           | <b>Osteopathy</b>         | <b>Physiotherapy</b>          |
|---------------------------|-------------------------------|---------------------------|-------------------------------|
| <b>2020 Q1</b>            |                               |                           |                               |
| <i>Number of services</i> |                               |                           |                               |
| Observed                  | 18,860                        | 1,998                     | 22,606                        |
| Forecast point estimate   | 19,429                        | 2,109                     | 24,259                        |
| 95% prediction interval   | 18,675 to 20,184              | 2,062 to 2,157            | 23,340 to 25,179              |
| Mean error                | -569                          | -111                      | -1,653                        |
| Mean percentage error     | -3.0%                         | -5.6%                     | -7.3%                         |
| <i>Total cost</i>         |                               |                           |                               |
| Observed                  | \$1,196,391                   | \$180,879                 | \$1,737,762                   |
| Forecast point estimate   | \$1,249,241                   | \$188,931                 | \$1,885,787                   |
| 95% prediction interval   | \$1,177,381 to<br>\$1,321,101 | \$176,536 to<br>\$201,326 | \$1,787,601 to<br>\$1,983,973 |
| Mean error                | -\$52,850                     | -\$8,053                  | -\$148,025                    |
| Mean percentage error     | -4.4%                         | -4.5%                     | -8.5%                         |
| <b>2020 Q2</b>            |                               |                           |                               |
| <i>Number of services</i> |                               |                           |                               |
| Observed                  | 17,796                        | 1,774                     | 18,664                        |
| Forecast point estimate   | 18,960                        | 2,126                     | 25,054                        |
| 95% prediction interval   | 18,205 to 19,714              | 2,078 to 2,173            | 24,055 to 26,052              |
| Mean error                | -1,164                        | -352                      | -6,390                        |
| Mean percentage error     | -6.5%                         | -19.8%                    | -34.2%                        |
| <i>Total cost</i>         |                               |                           |                               |
| Observed                  | \$1,151,911                   | \$163,645                 | \$1,519,059                   |
| Forecast point estimate   | \$1,215,035                   | \$186,946                 | \$1,898,031                   |
| 95% prediction interval   | \$1,143,175 to<br>\$1,286,896 | \$174,551 to<br>\$199,341 | \$1,799,845 to<br>\$1,996,217 |
| Mean error                | -\$63,124                     | -\$23,300                 | -\$378,972                    |
| Mean percentage error     | -5.5%                         | -14.2%                    | -24.9%                        |

**Supplementary Figure S4:** Heatmap of the estimated mean percentage error in number of services provided per 100,000 insured persons by each manual therapy profession during the first half of 2020 across Australian States and Territories

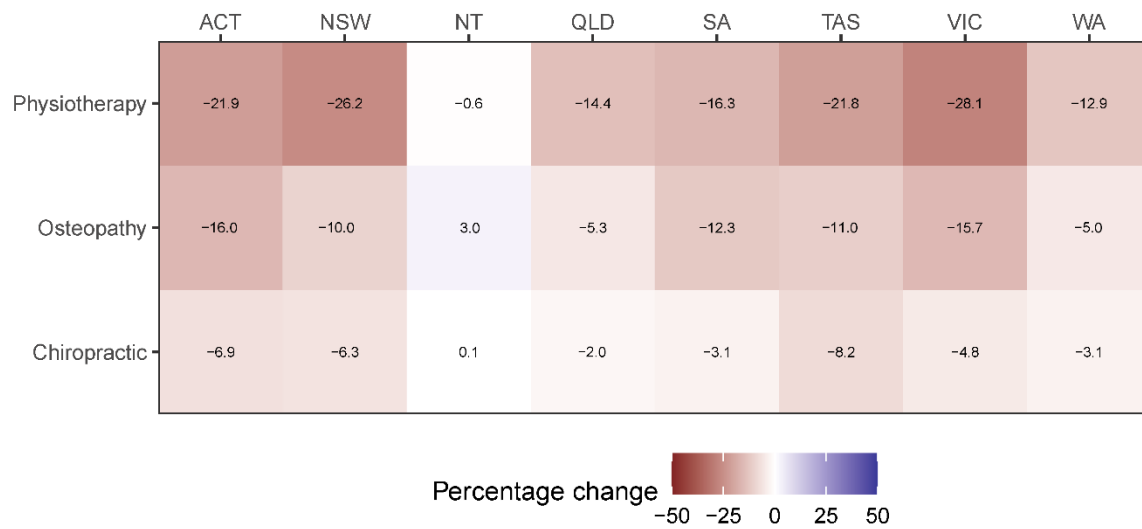

**Supplementary Figure S5:** Heatmap of the estimated mean percentage error in total cost of services provided per 100,000 insured persons by each manual therapy profession during the first half of 2020 across Australian States and Territories

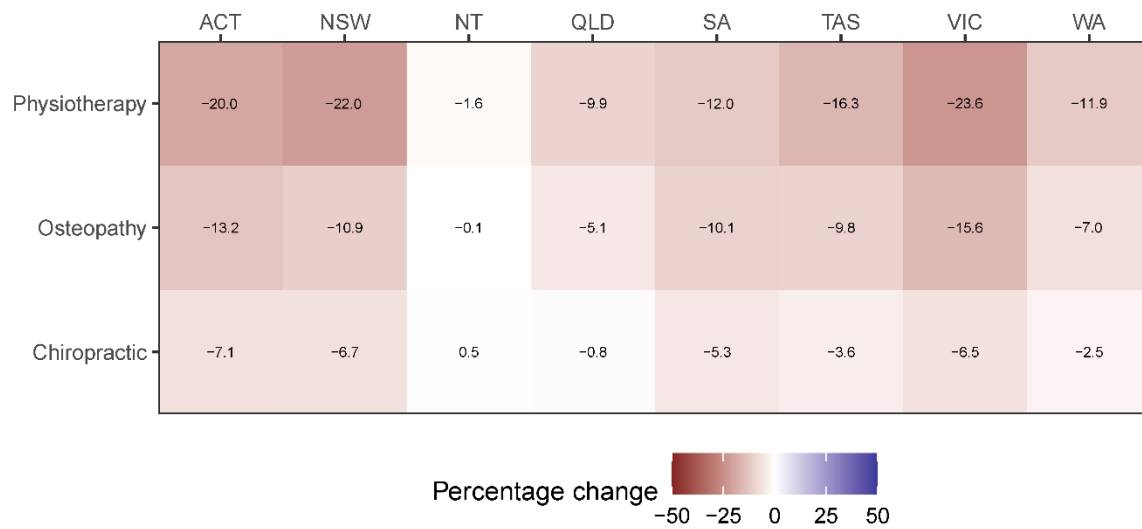

## Section C: Supplementary analyses per provider

**Supplementary Figure S6:** Time series plot of observed values and point forecast estimates with 95% prediction intervals of the quarterly number of services provided per provider by each manual therapy profession from 2015 to 2020 Q2

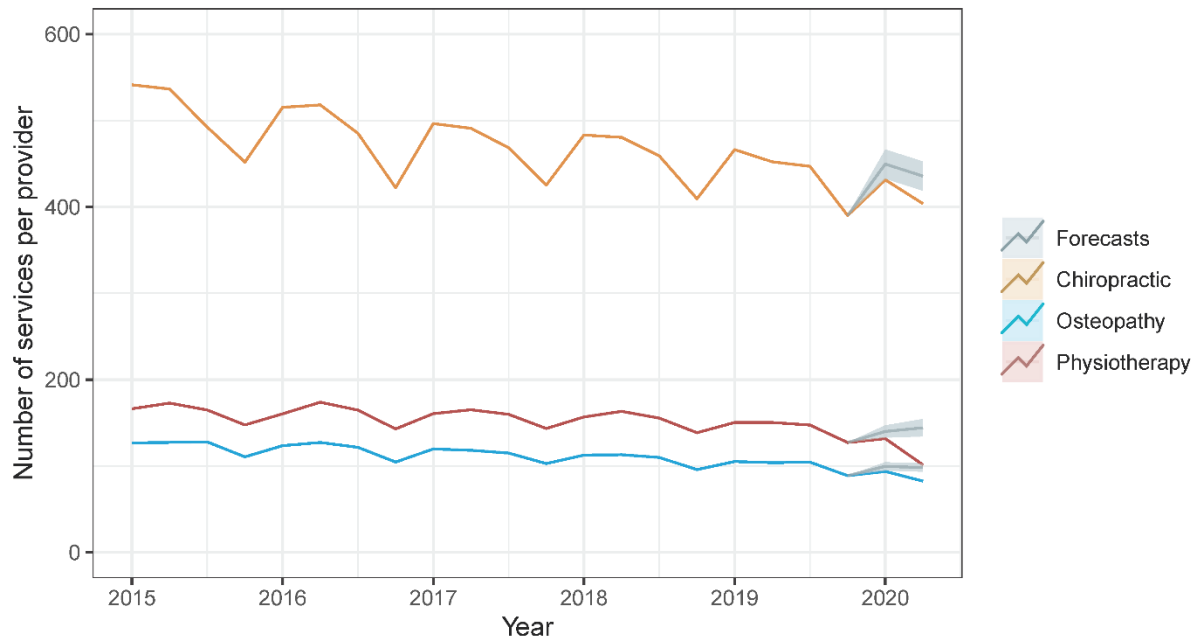

**Supplementary Figure S7:** Time series plot of observed values and point forecast estimates with 95% prediction intervals of the quarterly total cost of services provided per provider by each manual therapy profession from 2015 to 2020 Q2

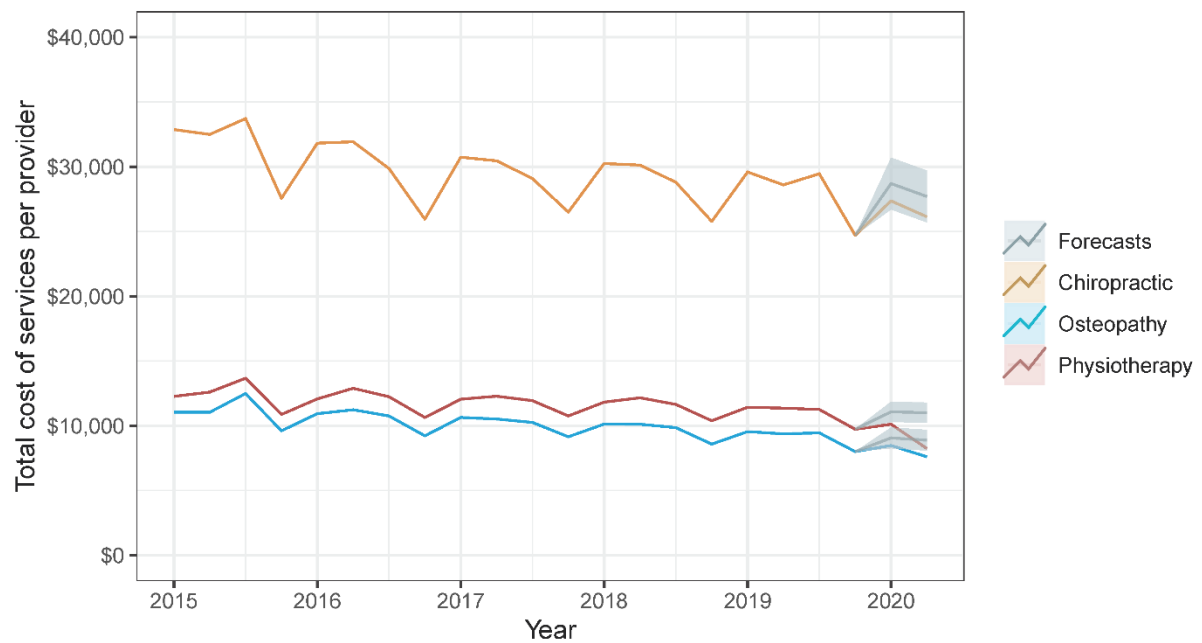

**Supplementary Table S2:** Observed values, forecast point estimates with 95% prediction intervals, mean errors, and mean percentage errors of the quarterly number and total cost of services provided per provider by each manual therapy profession in Australia during 2020 Q1 and Q2

|                           | <b>Chiropractic</b>  | <b>Osteopathy</b>  | <b>Physiotherapy</b> |
|---------------------------|----------------------|--------------------|----------------------|
| <b>2020 Q1</b>            |                      |                    |                      |
| <i>Number of services</i> |                      |                    |                      |
| Observed                  | 431.3                | 93.6               | 131.6                |
| Forecast point estimate   | 449.6                | 99.5               | 139.9                |
| 95% prediction interval   | 432.7 to 466.5       | 94.7 to 104.3      | 132.8 to 147.0       |
| Mean error                | -18.3                | -5.8               | -8.3                 |
| Mean percentage error     | -4.2%                | -6.2%              | -6.3%                |
| <i>Total cost</i>         |                      |                    |                      |
| Observed                  | \$27,362             | \$8,477            | \$10,118             |
| Forecast point estimate   | \$28,698             | \$9,062            | \$11,074             |
| 95% prediction interval   | \$26,697 to \$30,700 | \$8,256 to \$9,867 | \$8,081 to \$9,692   |
| Mean error                | -\$1,336             | -\$585             | -\$957               |
| Mean percentage error     | -4.9%                | -6.9%              | -9.5%                |
| <b>2020 Q2</b>            |                      |                    |                      |
| <i>Number of services</i> |                      |                    |                      |
| Observed                  | 403.7                | 82.4               | 101.3                |
| Forecast point estimate   | 435.6                | 98.1               | 144.2                |
| 95% prediction interval   | 418.7 to 452.4       | 93.3 to 103.0      | 134.2 to 154.3       |
| Mean error                | -31.8                | -15.7              | -43.0                |
| Mean percentage error     | -7.9                 | -19.1              | -42.4                |
| <i>Total cost</i>         |                      |                    |                      |
| Observed                  | \$26,132             | \$7,602            | \$8,242              |
| Forecast point estimate   | \$27,702             | \$8,887            | \$11,008             |
| 95% prediction interval   | \$25,700 to \$29,703 | \$8,081 to \$9,692 | \$10,225 to \$11,791 |
| Mean error                | -\$1,569             | -\$1,284           | -\$2,766             |
| Mean percentage error     | -6.0%                | -16.9%             | -33.6%               |

**Supplementary Figure S8:** Heatmap of the estimated mean percentage error in number of services provided per provider by each manual therapy profession during the first half of 2020 across Australian States and Territories

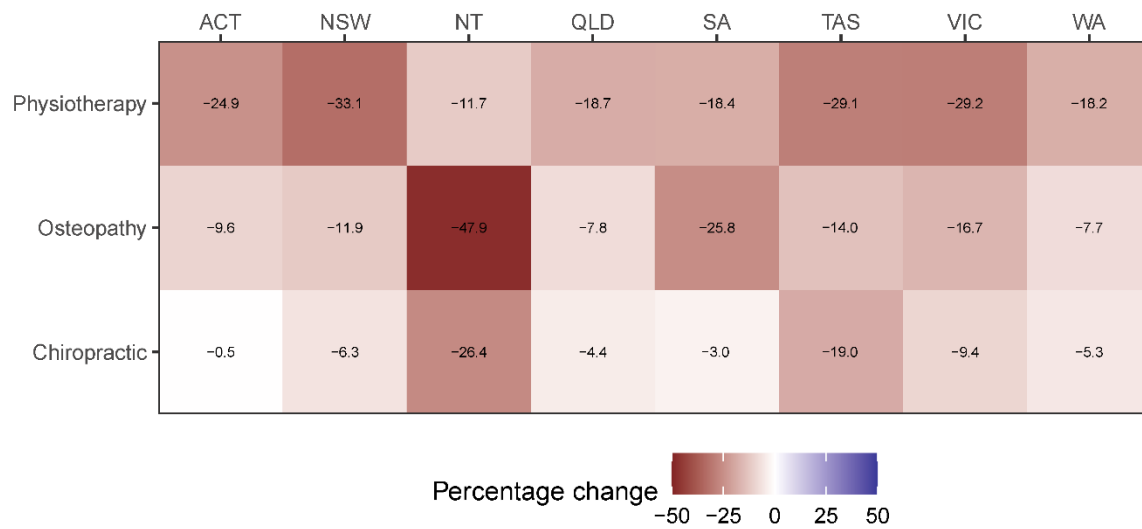

**Supplementary Figure S9:** Heatmap of the estimated mean percentage error in total cost of services provided per provider by each manual therapy profession during the first half of 2020 across Australian States and Territories

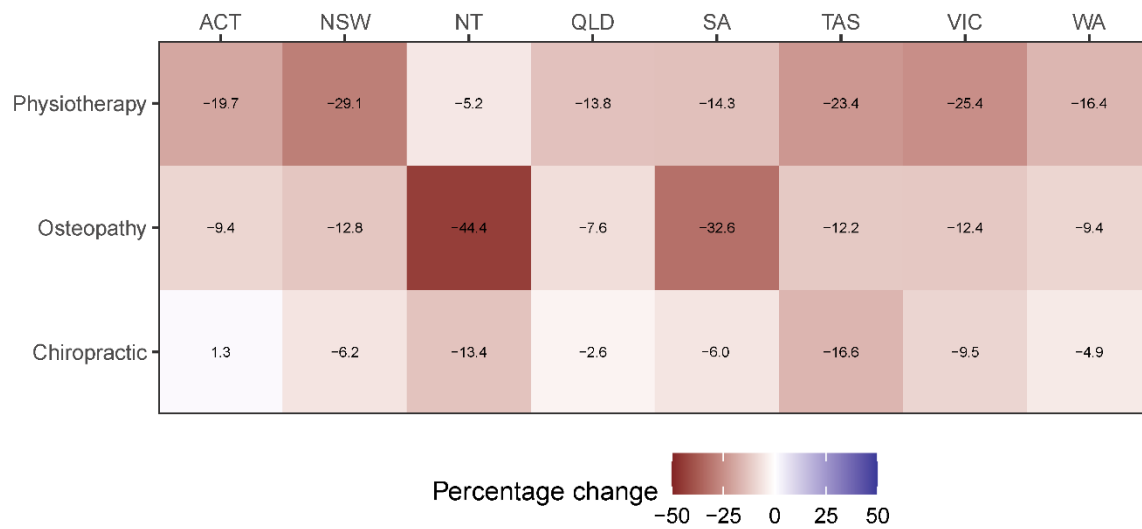

Supplement: Supplementary file 1 [file healthcare-08-00558-s001.pdf]
